# Supplementary material for: Copper-induced activation of TRPs and VDCCs triggers a calcium signature response regulating gene expression in Ectocarpus siliculosus
Source: PeerJ. 2018 Apr 16;6:e4556. doi: 10.7717/peerj.4556 (PMC5907779; doi:10.7717/peerj.4556)
Supplement: Supplemental Information 2 [file peerj-06-4556-s002.xlsx]

## Sheet: Hoja1
Supplementary Table 1 – Statistical analysis for ps transcript levels at 6 h of copper exposure (Fig. 5A,C)
Number of families	1
Number of comparisons per family	3
Alpha	0.05
Tukey's multiple comparisons test	Mean Diff.	95% CI of diff.	Significant?	Summary
Copper only vs. TRP inh 10 min	0.9987	0.2057 to 1.792	Yes	*
Copper only vs. TRP inh 60 min	-0.02295	-0.8160 to 0.7700	No	ns
TRP inh 10 min vs. TRP inh 60 min	-1.022	-1.815 to -0.2287	Yes	*
Test details	Mean 1	Mean 2	Mean Diff.	SE of diff.	n1	n2	q	DF
Copper only vs. TRP inh 10 min	2.196	1.197	0.9987	0.284	4	4	4.973	9
Copper only vs. TRP inh 60 min	2.196	2.219	-0.02295	0.284	4	4	0.1143	9
TRP inh 10 min vs. TRP inh 60 min	1.197	2.219	-1.022	0.284	4	4	5.087	9
