# Supplementary material for: Copper-induced activation of TRPs and VDCCs triggers a calcium signature response regulating gene expression in Ectocarpus siliculosus
Source: PeerJ. 2018 Apr 16;6:e4556. doi: 10.7717/peerj.4556 (PMC5907779; doi:10.7717/peerj.4556)
Supplement: Supplemental Information 3 [file peerj-06-4556-s003.xlsx]

## Sheet: Hoja1
Supplementary Table 2 – Statistical analysis for ps transcript levels at 6 h of copper exposure (Fig. 5E,G,I)
Number of families	1
Number of comparisons per family	21
Alpha	0.05
Tukey's multiple comparisons test	Mean Diff.	95% CI of diff.	Significant?	Summary
Copper vs. Nif 2,5 h+Cu	2.181	0.8426 to 3.519	Yes	**
Copper vs. Ver 2,5 h+Cu	1.976	0.6382 to 3.315	Yes	**
Copper vs. Nif 8,5 h+Cu	2.015	0.6770 to 3.353	Yes	**
Copper vs. Ver 8,5 h+Cu	2.188	0.8499 to 3.526	Yes	**
Copper vs. Nif 10 h+Cu	0.08854	-1.250 to 1.427	No	ns
Copper vs. Ver 10 h+Cu	0.2687	-1.069 to 1.607	No	ns
Nif 2,5 h+Cu vs. Ver 2,5 h+Cu	-0.2044	-1.543 to 1.134	No	ns
Nif 2,5 h+Cu vs. Nif 8,5 h+Cu	-0.1656	-1.504 to 1.173	No	ns
Nif 2,5 h+Cu vs. Ver 8,5 h+Cu	0.007301	-1.331 to 1.345	No	ns
Nif 2,5 h+Cu vs. Nif 10 h+Cu	-2.092	-3.430 to -0.7541	Yes	**
Nif 2,5 h+Cu vs. Ver 10 h+Cu	-1.912	-3.250 to -0.5739	Yes	**
Ver 2,5 h+Cu vs. Nif 8,5 h+Cu	0.03874	-1.299 to 1.377	No	ns
Ver 2,5 h+Cu vs. Ver 8,5 h+Cu	0.2117	-1.127 to 1.550	No	ns
Ver 2,5 h+Cu vs. Nif 10 h+Cu	-1.888	-3.226 to -0.5497	Yes	**
Ver 2,5 h+Cu vs. Ver 10 h+Cu	-1.708	-3.046 to -0.3695	Yes	**
Nif 8,5 h+Cu vs. Ver 8,5 h+Cu	0.1729	-1.165 to 1.511	No	ns
Nif 8,5 h+Cu vs. Nif 10 h+Cu	-1.927	-3.265 to -0.5884	Yes	**
Nif 8,5 h+Cu vs. Ver 10 h+Cu	-1.746	-3.085 to -0.4082	Yes	**
Ver 8,5 h+Cu vs. Nif 10 h+Cu	-2.1	-3.438 to -0.7614	Yes	**
Ver 8,5 h+Cu vs. Ver 10 h+Cu	-1.919	-3.257 to -0.5812	Yes	**
Nif 10 h+Cu vs. Ver 10 h+Cu	0.1802	-1.158 to 1.518	No	ns
Test details	Mean 1	Mean 2	Mean Diff.	SE of diff.	n1	n2	q	DF
Copper vs. Nif 2,5 h+Cu	3.238	1.057	2.181	0.3919	3	3	7.87	14
Copper vs. Ver 2,5 h+Cu	3.238	1.261	1.976	0.3919	3	3	7.132	14
Copper vs. Nif 8,5 h+Cu	3.238	1.223	2.015	0.3919	3	3	7.272	14
Copper vs. Ver 8,5 h+Cu	3.238	1.05	2.188	0.3919	3	3	7.896	14
Copper vs. Nif 10 h+Cu	3.238	3.149	0.08854	0.3919	3	3	0.3195	14
Copper vs. Ver 10 h+Cu	3.238	2.969	0.2687	0.3919	3	3	0.9697	14
Nif 2,5 h+Cu vs. Ver 2,5 h+Cu	1.057	1.261	-0.2044	0.3919	3	3	0.7375	14
Nif 2,5 h+Cu vs. Nif 8,5 h+Cu	1.057	1.223	-0.1656	0.3919	3	3	0.5977	14
Nif 2,5 h+Cu vs. Ver 8,5 h+Cu	1.057	1.05	0.007301	0.3919	3	3	0.02635	14
Nif 2,5 h+Cu vs. Nif 10 h+Cu	1.057	3.149	-2.092	0.3919	3	3	7.55	14
Nif 2,5 h+Cu vs. Ver 10 h+Cu	1.057	2.969	-1.912	0.3919	3	3	6.9	14
Ver 2,5 h+Cu vs. Nif 8,5 h+Cu	1.261	1.223	0.03874	0.3919	3	3	0.1398	14
Ver 2,5 h+Cu vs. Ver 8,5 h+Cu	1.261	1.05	0.2117	0.3919	3	3	0.7638	14
Ver 2,5 h+Cu vs. Nif 10 h+Cu	1.261	3.149	-1.888	0.3919	3	3	6.813	14
Ver 2,5 h+Cu vs. Ver 10 h+Cu	1.261	2.969	-1.708	0.3919	3	3	6.162	14
Nif 8,5 h+Cu vs. Ver 8,5 h+Cu	1.223	1.05	0.1729	0.3919	3	3	0.624	14
Nif 8,5 h+Cu vs. Nif 10 h+Cu	1.223	3.149	-1.927	0.3919	3	3	6.952	14
Nif 8,5 h+Cu vs. Ver 10 h+Cu	1.223	2.969	-1.746	0.3919	3	3	6.302	14
Ver 8,5 h+Cu vs. Nif 10 h+Cu	1.05	3.149	-2.1	0.3919	3	3	7.576	14
Ver 8,5 h+Cu vs. Ver 10 h+Cu	1.05	2.969	-1.919	0.3919	3	3	6.926	14
Nif 10 h+Cu vs. Ver 10 h+Cu	3.149	2.969	0.1802	0.3919	3	3	0.6502	14
