# Supplementary material for: Copper-induced activation of TRPs and VDCCs triggers a calcium signature response regulating gene expression in Ectocarpus siliculosus
Source: PeerJ. 2018 Apr 16;6:e4556. doi: 10.7717/peerj.4556 (PMC5907779; doi:10.7717/peerj.4556)
Supplement: Supplemental Information 4 [file peerj-06-4556-s004.xlsx]

## Sheet: Hoja1
Supplementary Table 3 – Statistical analysis for mt transcript levels at 6 h of copper exposure (Fig. 5B,D)
Number of families	1
Number of comparisons per family	3
Alpha	0.05
Tukey's multiple comparisons test	Mean Diff.	95% CI of diff.	Significant?	Summary
Copper only vs. TRP inh 10 min	0.9058	0.08235 to 1.729	Yes	*
Copper only vs. TRP inh 60 min	-0.4806	-1.304 to 0.3429	No	ns
TRP inh 10 min vs. TRP inh 60 min	-1.386	-2.210 to -0.5629	Yes	**
Test details	Mean 1	Mean 2	Mean Diff.	SE of diff.	n1	n2	q	DF
Copper only vs. TRP inh 10 min	2.158	1.253	0.9058	0.2949	4	4	4.343	9
Copper only vs. TRP inh 60 min	2.158	2.639	-0.4806	0.2949	4	4	2.304	9
TRP inh 10 min vs. TRP inh 60 min	1.253	2.639	-1.386	0.2949	4	4	6.648	9
