# Supplementary material for: Copper-induced activation of TRPs and VDCCs triggers a calcium signature response regulating gene expression in Ectocarpus siliculosus
Source: PeerJ. 2018 Apr 16;6:e4556. doi: 10.7717/peerj.4556 (PMC5907779; doi:10.7717/peerj.4556)
Supplement: Supplemental Information 5 [file peerj-06-4556-s005.xlsx]

## Sheet: Hoja1
Supplementary Table 4 – Statistical analysis for mt transcript levels at 6 h of copper exposure (Fig. 5F,H,J)
Number of families	1
Number of comparisons per family	21
Alpha	0.05
Tukey's multiple comparisons test	Mean Diff.	95% CI of diff.	Significant?	Summary
Copper vs. Nif 2,5 h+Cu	2.207	0.8623 to 3.552	Yes	***
Copper vs. Ver 2,5 h+Cu	2.076	0.7311 to 3.420	Yes	**
Copper vs. Nif 8,5 h+Cu	2.299	0.9546 to 3.644	Yes	***
Copper vs. Ver 8,5 h+Cu	2.178	0.8339 to 3.523	Yes	**
Copper vs. Nif 10 h+Cu	-0.1918	-1.536 to 1.153	No	ns
Copper vs. Ver 10 h+Cu	0.2034	-1.141 to 1.548	No	ns
Nif 2,5 h+Cu vs. Ver 2,5 h+Cu	-0.1312	-1.476 to 1.213	No	ns
Nif 2,5 h+Cu vs. Nif 8,5 h+Cu	0.09232	-1.252 to 1.437	No	ns
Nif 2,5 h+Cu vs. Ver 8,5 h+Cu	-0.02841	-1.373 to 1.316	No	ns
Nif 2,5 h+Cu vs. Nif 10 h+Cu	-2.399	-3.743 to -1.054	Yes	***
Nif 2,5 h+Cu vs. Ver 10 h+Cu	-2.003	-3.348 to -0.6588	Yes	**
Ver 2,5 h+Cu vs. Nif 8,5 h+Cu	0.2235	-1.121 to 1.568	No	ns
Ver 2,5 h+Cu vs. Ver 8,5 h+Cu	0.1028	-1.242 to 1.447	No	ns
Ver 2,5 h+Cu vs. Nif 10 h+Cu	-2.267	-3.612 to -0.9229	Yes	***
Ver 2,5 h+Cu vs. Ver 10 h+Cu	-1.872	-3.217 to -0.5277	Yes	**
Nif 8,5 h+Cu vs. Ver 8,5 h+Cu	-0.1207	-1.465 to 1.224	No	ns
Nif 8,5 h+Cu vs. Nif 10 h+Cu	-2.491	-3.836 to -1.146	Yes	***
Nif 8,5 h+Cu vs. Ver 10 h+Cu	-2.096	-3.440 to -0.7512	Yes	**
Ver 8,5 h+Cu vs. Nif 10 h+Cu	-2.37	-3.715 to -1.026	Yes	***
Ver 8,5 h+Cu vs. Ver 10 h+Cu	-1.975	-3.320 to -0.6304	Yes	**
Nif 10 h+Cu vs. Ver 10 h+Cu	0.3952	-0.9494 to 1.740	No	ns
Test details	Mean 1	Mean 2	Mean Diff.	SE of diff.	n1	n2	q	DF
Copper vs. Nif 2,5 h+Cu	3.364	1.157	2.207	0.3938	3	3	7.926	14
Copper vs. Ver 2,5 h+Cu	3.364	1.288	2.076	0.3938	3	3	7.454	14
Copper vs. Nif 8,5 h+Cu	3.364	1.064	2.299	0.3938	3	3	8.257	14
Copper vs. Ver 8,5 h+Cu	3.364	1.185	2.178	0.3938	3	3	7.824	14
Copper vs. Nif 10 h+Cu	3.364	3.555	-0.1918	0.3938	3	3	0.6888	14
Copper vs. Ver 10 h+Cu	3.364	3.16	0.2034	0.3938	3	3	0.7305	14
Nif 2,5 h+Cu vs. Ver 2,5 h+Cu	1.157	1.288	-0.1312	0.3938	3	3	0.4712	14
Nif 2,5 h+Cu vs. Nif 8,5 h+Cu	1.157	1.064	0.09232	0.3938	3	3	0.3315	14
Nif 2,5 h+Cu vs. Ver 8,5 h+Cu	1.157	1.185	-0.02841	0.3938	3	3	0.102	14
Nif 2,5 h+Cu vs. Nif 10 h+Cu	1.157	3.555	-2.399	0.3938	3	3	8.614	14
Nif 2,5 h+Cu vs. Ver 10 h+Cu	1.157	3.16	-2.003	0.3938	3	3	7.195	14
Ver 2,5 h+Cu vs. Nif 8,5 h+Cu	1.288	1.064	0.2235	0.3938	3	3	0.8027	14
Ver 2,5 h+Cu vs. Ver 8,5 h+Cu	1.288	1.185	0.1028	0.3938	3	3	0.3691	14
Ver 2,5 h+Cu vs. Nif 10 h+Cu	1.288	3.555	-2.267	0.3938	3	3	8.143	14
Ver 2,5 h+Cu vs. Ver 10 h+Cu	1.288	3.16	-1.872	0.3938	3	3	6.724	14
Nif 8,5 h+Cu vs. Ver 8,5 h+Cu	1.064	1.185	-0.1207	0.3938	3	3	0.4336	14
Nif 8,5 h+Cu vs. Nif 10 h+Cu	1.064	3.555	-2.491	0.3938	3	3	8.946	14
Nif 8,5 h+Cu vs. Ver 10 h+Cu	1.064	3.16	-2.096	0.3938	3	3	7.527	14
Ver 8,5 h+Cu vs. Nif 10 h+Cu	1.185	3.555	-2.37	0.3938	3	3	8.512	14
Ver 8,5 h+Cu vs. Ver 10 h+Cu	1.185	3.16	-1.975	0.3938	3	3	7.093	14
Nif 10 h+Cu vs. Ver 10 h+Cu	3.555	3.16	0.3952	0.3938	3	3	1.419	14
